# Supplementary material for: Covert attention to obstacles biases zebrafish escape direction
Source: bioRxiv or medRxiv preprint supplement (doi:10.1101/2022.04.14.488363), 2022-05-11
Supplement: Supplementary file [file media-1.pdf]

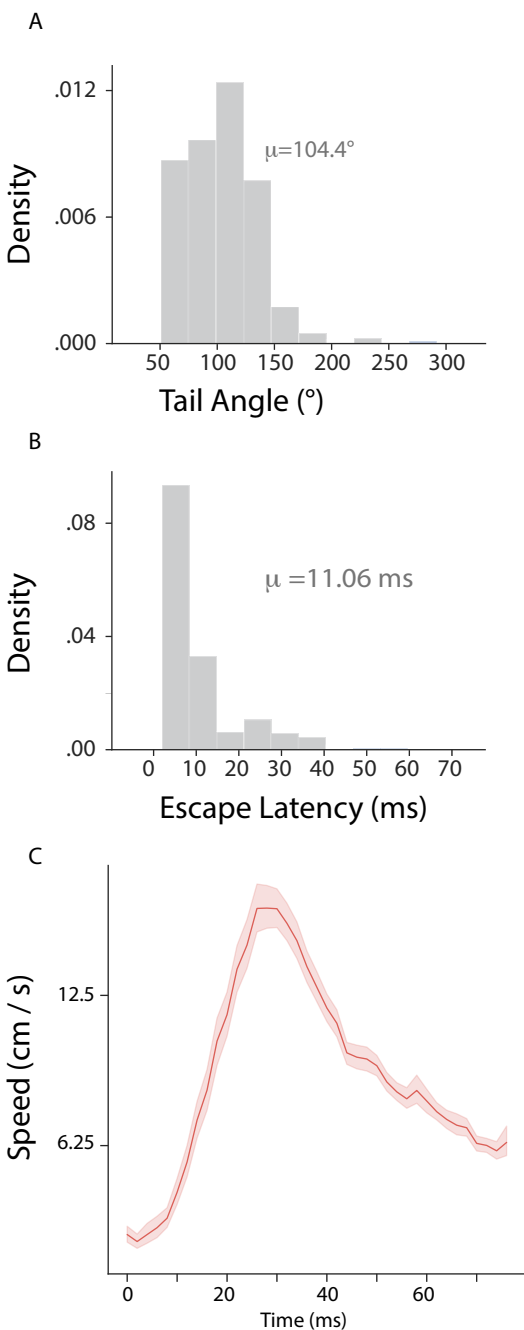

**Figure S1:** A. Distribution of maximum cumulative tail angle per escape for all fish tested in barrier conditions. B. Distribution of escape latencies (ms from tap contact with dish until maximum tail angle). C. Timeseries plot of velocity of the fish starting at tap command (light red = 95% CI).
